# Supplementary material
Source: PubMed Central journal article supplement (PMC9307322)
Supplement: 10-1055-s-0041-1740104-s2100016.pdf [file 10-1055-s-0041-1740104-s2100016.pdf]

**Supplementary Table 1** The HOM-CASE guidelines checklist for a case report

| Item                     | Content                                                                                                                                                                                                                                                                                                                                                                                                                         | Page |
|--------------------------|---------------------------------------------------------------------------------------------------------------------------------------------------------------------------------------------------------------------------------------------------------------------------------------------------------------------------------------------------------------------------------------------------------------------------------|------|
| Title                    | The word “case report” should be in the title along with what is of greatest interest in this case.                                                                                                                                                                                                                                                                                                                             | 1    |
| Keywords                 | The key elements of this case in 2 to 5 keywords.                                                                                                                                                                                                                                                                                                                                                                               | 1    |
| Abstract                 | Introduction—what is unique about this case? What does it add to the medical literature? The main symptoms of the patient and the important clinical findings. The main diagnoses, therapeutic interventions, and outcomes. Conclusion—what are the main “take-away” lessons from this case?                                                                                                                                    | 1    |
| Introduction             | Brief background summary of this case, referencing the relevant medical literature                                                                                                                                                                                                                                                                                                                                              | 1    |
| Patient information      | Demographic information (such as age, gender, ethnicity, occupation). Main symptoms of the patient (his or her chief complaints). Medical, family, and psychosocial history, including co-morbidities and relevant genetic information. Relevant past interventions and their outcomes.                                                                                                                                         | 2    |
| Clinical findings        | Describe the relevant physical examination (PE) findings and clinical history detail (homeopathic symptoms used for decision, etc.)                                                                                                                                                                                                                                                                                             | 2    |
| Timeline                 | Depicts important milestones related to your diagnoses and interventions (table or figure).                                                                                                                                                                                                                                                                                                                                     | 4    |
| Diagnostic assessment    | Diagnostic methods (such as PE, laboratory testing, imaging, questionnaires). Diagnostic challenges (such as financial, language or cultural). Diagnostic reasoning including other diagnoses considered. Prognostic characteristics (such as staging in oncology) where applicable.                                                                                                                                            | 3    |
| Therapeutic intervention | Types of interventions (such as pharmacological, surgical, preventive, self-care). Type of homeopathy: individualized/formula; single- or multi-constituents/isopathy. Medication(s): nomenclature (list individual prescriptions or constituents + trade names), manufacture, potency, scale and galenic form. Administration of interventions (such as dosage, strength, duration). Changes in intervention (with rationale). | 3    |
| Follow-up and outcomes   | Clinician- and patient-assessed outcomes. Important follow-up test results. Intervention adherence and tolerability (How was this assessed?) Adverse and unanticipated events. Objective evidence (if applicable). Occurrence of homeopathic aggravation. Possible causal attribution of changes explicitly assessed/discussed.                                                                                                 | 4    |
| Discussion               | Discussion of the strengths and limitations in the management of this case. Discussion of the relevant medical literature. The rationale for conclusions (including assessment of possible causes). The main “take-away” lessons of this case report.                                                                                                                                                                           | 4    |
| Patient perspective      | Did the patient share his or her perspective or experience? (include whenever possible)                                                                                                                                                                                                                                                                                                                                         | Yes  |
| Informed consent         | Did the patient give informed consent? Please provide if requested.                                                                                                                                                                                                                                                                                                                                                             | Yes  |
